# Supplementary material for: Wild cereal grain consumption among Early Holocene foragers of the Balkans predates the arrival of agriculture
Source: eLife. 2021 Dec 1;10:e72976. doi: 10.7554/eLife.72976 (PMC8782571; doi:10.7554/eLife.72976)
Supplement: Table 5—source data 1. [file elife-72976-table5-data1.xlsx]

## Sheet: Sheet1
specimen	length	group
Ae. speltoides tauschii	26.718	wild grass grains
Ae. speltoides tauschii	39.97	wild grass grains
Ae. speltoides tauschii	35.857	wild grass grains
Ae. speltoides tauschii	22.227	wild grass grains
Ae. speltoides tauschii	23.612	wild grass grains
Ae. speltoides tauschii	29.714	wild grass grains
Ae. speltoides tauschii	13.254	wild grass grains
Ae. speltoides tauschii	30.714	wild grass grains
Ae. speltoides tauschii	29.458	wild grass grains
Ae. speltoides tauschii	28.561	wild grass grains
Ae. speltoides tauschii	20.138	wild grass grains
Ae. speltoides tauschii	15.519	wild grass grains
Ae. speltoides tauschii	31.325	wild grass grains
Ae. speltoides tauschii	28.938	wild grass grains
Ae. speltoides tauschii	16.495	wild grass grains
Ae. speltoides tauschii	19.63	wild grass grains
Ae. speltoides tauschii	15.534	wild grass grains
Ae. speltoides tauschii	27.388	wild grass grains
Ae. speltoides tauschii	18.417	wild grass grains
Ae. speltoides tauschii	17.565	wild grass grains
Ae. speltoides tauschii	33.304	wild grass grains
Ae. speltoides tauschii	15.773	wild grass grains
Ae. speltoides tauschii	27.401	wild grass grains
Ae. speltoides tauschii	19.361	wild grass grains
Ae. speltoides tauschii	26.107	wild grass grains
Ae. speltoides tauschii	32.9	wild grass grains
Ae. speltoides tauschii	22.34	wild grass grains
Ae. speltoides tauschii	17.594	wild grass grains
Ae. speltoides tauschii	18.883	wild grass grains
Ae. speltoides tauschii	17.838	wild grass grains
Ae. speltoides tauschii	22.34	wild grass grains
Ae. speltoides tauschii	30.038	wild grass grains
Ae. speltoides tauschii	26.987	wild grass grains
Ae. speltoides tauschii	20.827	wild grass grains
Ae. speltoides tauschii	21.551	wild grass grains
Ae. speltoides tauschii	16.332	wild grass grains
Ae. speltoides tauschii	21.468	wild grass grains
Ae. speltoides tauschii	22.64	wild grass grains
Ae. speltoides tauschii	30.493	wild grass grains
Ae. speltoides tauschii	25.716	wild grass grains
Ae. speltoides tauschii	22.028	wild grass grains
Ae. speltoides tauschii	16.974	wild grass grains
Ae. speltoides tauschii	21.546	wild grass grains
Ae. speltoides tauschii	22.266	wild grass grains
Ae. speltoides tauschii	25.324	wild grass grains
Ae. speltoides tauschii	23.275	wild grass grains
Ae. speltoides tauschii	21.869	wild grass grains
Ae. speltoides tauschii	21.695	wild grass grains
Ae. speltoides tauschii	17.529	wild grass grains
Ae. speltoides tauschii	19.439	wild grass grains
Ae. ventricosa	14.096	wild grass grains
Ae. ventricosa	14.637	wild grass grains
Ae. ventricosa	15.062	wild grass grains
Ae. ventricosa	15.598	wild grass grains
Ae. ventricosa	15.656	wild grass grains
Ae. ventricosa	15.773	wild grass grains
Ae. ventricosa	17.308	wild grass grains
Ae. ventricosa	18.369	wild grass grains
Ae. ventricosa	18.93	wild grass grains
Ae. ventricosa	19.792	wild grass grains
Ae. ventricosa	20.054	wild grass grains
Ae. ventricosa	20.22	wild grass grains
Ae. ventricosa	20.49	wild grass grains
Ae. ventricosa	20.69	wild grass grains
Ae. ventricosa	21.084	wild grass grains
Ae. ventricosa	21.38	wild grass grains
Ae. ventricosa	21.966	wild grass grains
Ae. ventricosa	22.029	wild grass grains
Ae. ventricosa	22.17	wild grass grains
Ae. ventricosa	22.659	wild grass grains
Ae. ventricosa	23.147	wild grass grains
Ae. ventricosa	24.002	wild grass grains
Ae. ventricosa	24.286	wild grass grains
Ae. ventricosa	25.353	wild grass grains
Ae. ventricosa	25.512	wild grass grains
Ae. ventricosa	25.951	wild grass grains
Ae. ventricosa	26.499	wild grass grains
Ae. ventricosa	26.67	wild grass grains
Ae. ventricosa	26.75	wild grass grains
Ae. ventricosa	27.202	wild grass grains
Ae. ventricosa	28.78	wild grass grains
Ae. ventricosa	29.019	wild grass grains
Ae. ventricosa	30.298	wild grass grains
Ae. ventricosa	30.451	wild grass grains
Ae. ventricosa	30.614	wild grass grains
Ae. ventricosa	32.301	wild grass grains
Ae. ventricosa	33.303	wild grass grains
Ae. ventricosa	33.308	wild grass grains
Ae. ventricosa	33.71	wild grass grains
Ae. ventricosa	33.972	wild grass grains
Ae. ventricosa	34.763	wild grass grains
Ae. ventricosa	34.831	wild grass grains
Ae. ventricosa	35.136	wild grass grains
Ae. ventricosa	36.426	wild grass grains
Ae. ventricosa	36.675	wild grass grains
Ae. ventricosa	36.851	wild grass grains
Ae. ventricosa	36.942	wild grass grains
Ae. ventricosa	37.274	wild grass grains
Ae. ventricosa	38.859	wild grass grains
Ae. ventricosa	40.04	wild grass grains
Ae. neglecta recta	58.42	wild grass grains
Ae. neglecta recta	55.726	wild grass grains
Ae. neglecta recta	20.307	wild grass grains
Ae. neglecta recta	19.506	wild grass grains
Ae. neglecta recta	13.893	wild grass grains
Ae. neglecta recta	10.537	wild grass grains
Ae. neglecta recta	24.978	wild grass grains
Ae. neglecta recta	36.847	wild grass grains
Ae. neglecta recta	62.712	wild grass grains
Ae. neglecta recta	36.68	wild grass grains
Ae. neglecta recta	48.952	wild grass grains
Ae. neglecta recta	51.922	wild grass grains
Ae. neglecta recta	17.761	wild grass grains
Ae. neglecta recta	53.521	wild grass grains
Ae. neglecta recta	32.576	wild grass grains
Ae. neglecta recta	43.322	wild grass grains
Ae. neglecta recta	57.146	wild grass grains
Ae. neglecta recta	46.798	wild grass grains
Ae. neglecta recta	20.446	wild grass grains
Ae. neglecta recta	37.802	wild grass grains
Ae. neglecta recta	19.398	wild grass grains
Ae. neglecta recta	17.315	wild grass grains
Ae. neglecta recta	42.426	wild grass grains
Ae. neglecta recta	15.848	wild grass grains
Ae. neglecta recta	41.647	wild grass grains
Ae. neglecta recta	15.351	wild grass grains
Ae. neglecta recta	17.34	wild grass grains
Ae. neglecta recta	53.163	wild grass grains
Ae. neglecta recta	51.227	wild grass grains
Ae. neglecta recta	28.648	wild grass grains
Ae. neglecta recta	40.201	wild grass grains
Ae. neglecta recta	53.338	wild grass grains
Ae. neglecta recta	35.786	wild grass grains
Ae. neglecta recta	46.064	wild grass grains
Ae. neglecta recta	47.052	wild grass grains
Ae. neglecta recta	18.225	wild grass grains
Ae. neglecta recta	50.75	wild grass grains
Ae. neglecta recta	30.393	wild grass grains
Ae. neglecta recta	12.298	wild grass grains
Ae. neglecta recta	32.378	wild grass grains
Ae. neglecta recta	24.906	wild grass grains
Ae. neglecta recta	46.854	wild grass grains
Ae. neglecta recta	25.903	wild grass grains
Ae. neglecta recta	33.74	wild grass grains
Ae. neglecta recta	34.701	wild grass grains
Ae. neglecta recta	43.123	wild grass grains
Ae. neglecta recta	37.65	wild grass grains
Ae. neglecta recta	31.578	wild grass grains
Ae. neglecta recta	38.732	wild grass grains
Ae. neglecta recta	15.773	wild grass grains
Ae. comosa	7.947	wild grass grains
Ae. comosa	7.954	wild grass grains
Ae. comosa	8.014	wild grass grains
Ae. comosa	8.6	wild grass grains
Ae. comosa	8.607	wild grass grains
Ae. comosa	8.834	wild grass grains
Ae. comosa	9.077	wild grass grains
Ae. comosa	9.222	wild grass grains
Ae. comosa	9.242	wild grass grains
Ae. comosa	9.644	wild grass grains
Ae. comosa	9.822	wild grass grains
Ae. comosa	10.335	wild grass grains
Ae. comosa	10.471	wild grass grains
Ae. comosa	11.773	wild grass grains
Ae. comosa	12.844	wild grass grains
Ae. comosa	13.261	wild grass grains
Ae. comosa	14.743	wild grass grains
Ae. comosa	15.18	wild grass grains
Ae. comosa	15.501	wild grass grains
Ae. comosa	16.418	wild grass grains
Ae. comosa	16.8	wild grass grains
Ae. comosa	17.701	wild grass grains
Ae. comosa	19.911	wild grass grains
Ae. comosa	20.523	wild grass grains
Ae. comosa	21.097	wild grass grains
Ae. comosa	22.314	wild grass grains
Ae. comosa	23.767	wild grass grains
Ae. comosa	25.744	wild grass grains
Ae. comosa	26.729	wild grass grains
Ae. comosa	26.962	wild grass grains
Ae. comosa	27.088	wild grass grains
Ae. comosa	27.217	wild grass grains
Ae. comosa	29.802	wild grass grains
Ae. comosa	30.072	wild grass grains
Ae. comosa	30.364	wild grass grains
Ae. comosa	30.549	wild grass grains
Ae. comosa	30.809	wild grass grains
Ae. comosa	30.918	wild grass grains
Ae. comosa	30.984	wild grass grains
Ae. comosa	31.117	wild grass grains
Ae. comosa	32.021	wild grass grains
Ae. comosa	32.468	wild grass grains
Ae. comosa	32.898	wild grass grains
Ae. comosa	33.085	wild grass grains
Ae. comosa	33.204	wild grass grains
Ae. comosa	33.691	wild grass grains
Ae. comosa	34.086	wild grass grains
Ae. comosa	34.174	wild grass grains
Ae. comosa	34.437	wild grass grains
Ae. comosa	34.542	wild grass grains
Ae. triuncialis	40.949	wild grass grains
Ae. triuncialis	32.078	wild grass grains
Ae. triuncialis	40.333	wild grass grains
Ae. triuncialis	15.202	wild grass grains
Ae. triuncialis	20.493	wild grass grains
Ae. triuncialis	40.941	wild grass grains
Ae. triuncialis	15.936	wild grass grains
Ae. triuncialis	10.633	wild grass grains
Ae. triuncialis	41.932	wild grass grains
Ae. triuncialis	50.061	wild grass grains
Ae. triuncialis	41.009	wild grass grains
Ae. triuncialis	33.202	wild grass grains
Ae. triuncialis	25.135	wild grass grains
Ae. triuncialis	47.058	wild grass grains
Ae. triuncialis	28.546	wild grass grains
Ae. triuncialis	21.785	wild grass grains
Ae. triuncialis	46.55	wild grass grains
Ae. triuncialis	27.942	wild grass grains
Ae. triuncialis	20.73	wild grass grains
Ae. triuncialis	39.396	wild grass grains
Ae. triuncialis	33.768	wild grass grains
Ae. triuncialis	17.927	wild grass grains
Ae. triuncialis	24.643	wild grass grains
Ae. triuncialis	21.909	wild grass grains
Ae. triuncialis	17.436	wild grass grains
Ae. triuncialis	33.515	wild grass grains
Ae. triuncialis	34.207	wild grass grains
Ae. triuncialis	23.624	wild grass grains
Ae. triuncialis	9.295	wild grass grains
Ae. triuncialis	26.523	wild grass grains
Ae. triuncialis	22.168	wild grass grains
Ae. triuncialis	33.085	wild grass grains
Ae. triuncialis	41.399	wild grass grains
Ae. triuncialis	32.375	wild grass grains
Ae. triuncialis	43.97	wild grass grains
Ae. triuncialis	24.119	wild grass grains
Ae. triuncialis	19.654	wild grass grains
Ae. triuncialis	35.206	wild grass grains
Ae. triuncialis	18.094	wild grass grains
Ae. triuncialis	5.603	wild grass grains
Ae. triuncialis	10.535	wild grass grains
Ae. triuncialis	12.394	wild grass grains
Ae. triuncialis	30.034	wild grass grains
Ae. triuncialis	11.021	wild grass grains
Ae. triuncialis	34.023	wild grass grains
Ae. triuncialis	29.442	wild grass grains
Ae. triuncialis	42.838	wild grass grains
Ae. triuncialis	34.562	wild grass grains
Ae. triuncialis	19.224	wild grass grains
Ae. triuncialis	25.965	wild grass grains
Ae. geniculata	34.119	wild grass grains
Ae. geniculata	24.667	wild grass grains
Ae. geniculata	19.104	wild grass grains
Ae. geniculata	35.701	wild grass grains
Ae. geniculata	15.203	wild grass grains
Ae. geniculata	24.062	wild grass grains
Ae. geniculata	36.533	wild grass grains
Ae. geniculata	28.939	wild grass grains
Ae. geniculata	30.438	wild grass grains
Ae. geniculata	25.128	wild grass grains
Ae. geniculata	29.024	wild grass grains
Ae. geniculata	36.447	wild grass grains
Ae. geniculata	25.744	wild grass grains
Ae. geniculata	31.754	wild grass grains
Ae. geniculata	23.407	wild grass grains
Ae. geniculata	34.129	wild grass grains
Ae. geniculata	39.358	wild grass grains
Ae. geniculata	33.938	wild grass grains
Ae. geniculata	19.984	wild grass grains
Ae. geniculata	28.705	wild grass grains
Ae. geniculata	40.271	wild grass grains
Ae. geniculata	19.013	wild grass grains
Ae. geniculata	42.141	wild grass grains
Ae. geniculata	30.608	wild grass grains
Ae. geniculata	15.359	wild grass grains
Ae. geniculata	11.612	wild grass grains
Ae. geniculata	14.371	wild grass grains
Ae. geniculata	28.416	wild grass grains
Ae. geniculata	47.03	wild grass grains
Ae. geniculata	18.627	wild grass grains
Ae. geniculata	19.465	wild grass grains
Ae. geniculata	30.115	wild grass grains
Ae. geniculata	33.726	wild grass grains
Ae. geniculata	22.34	wild grass grains
Ae. geniculata	19.276	wild grass grains
Ae. geniculata	20.906	wild grass grains
Ae. geniculata	30.164	wild grass grains
Ae. geniculata	26.061	wild grass grains
Ae. geniculata	16.82	wild grass grains
Ae. geniculata	26.127	wild grass grains
Ae. geniculata	32.109	wild grass grains
Ae. geniculata	17.735	wild grass grains
Ae. geniculata	14.108	wild grass grains
Ae. geniculata	12.596	wild grass grains
Ae. geniculata	35.272	wild grass grains
Ae. geniculata	16.548	wild grass grains
Ae. geniculata	17.648	wild grass grains
Ae. geniculata	25.512	wild grass grains
Ae. geniculata	25.911	wild grass grains
Ae. geniculata	27.991	wild grass grains
Ae. crassa	42.126	wild grass grains
Ae. crassa	21.681	wild grass grains
Ae. crassa	21.113	wild grass grains
Ae. crassa	49.275	wild grass grains
Ae. crassa	31.104	wild grass grains
Ae. crassa	49.239	wild grass grains
Ae. crassa	26.628	wild grass grains
Ae. crassa	24.827	wild grass grains
Ae. crassa	53.409	wild grass grains
Ae. crassa	20.185	wild grass grains
Ae. crassa	20.3	wild grass grains
Ae. crassa	28.287	wild grass grains
Ae. crassa	27.991	wild grass grains
Ae. crassa	44.151	wild grass grains
Ae. crassa	24.729	wild grass grains
Ae. crassa	29.37	wild grass grains
Ae. crassa	33.291	wild grass grains
Ae. crassa	33.922	wild grass grains
Ae. crassa	32.333	wild grass grains
Ae. crassa	48.485	wild grass grains
Ae. crassa	33.382	wild grass grains
Ae. crassa	45.99	wild grass grains
Ae. crassa	49.261	wild grass grains
Ae. crassa	29.641	wild grass grains
Ae. crassa	44.788	wild grass grains
Ae. crassa	32.057	wild grass grains
Ae. crassa	35.622	wild grass grains
Ae. crassa	42.741	wild grass grains
Ae. crassa	42.976	wild grass grains
Ae. crassa	30.949	wild grass grains
Ae. crassa	15.5	wild grass grains
Ae. crassa	41.298	wild grass grains
Ae. crassa	39.649	wild grass grains
Ae. crassa	20.269	wild grass grains
Ae. crassa	38.995	wild grass grains
Ae. crassa	53.685	wild grass grains
Ae. crassa	25.39	wild grass grains
Ae. crassa	40.35	wild grass grains
Ae. crassa	24.464	wild grass grains
Ae. crassa	49.091	wild grass grains
Ae. crassa	47.286	wild grass grains
Ae. crassa	23.137	wild grass grains
Ae. crassa	13.384	wild grass grains
Ae. crassa	51.458	wild grass grains
Ae. crassa	45.913	wild grass grains
Ae. crassa	25.574	wild grass grains
Ae. crassa	44.965	wild grass grains
Ae. crassa	34.729	wild grass grains
Ae. crassa	28.675	wild grass grains
Ae. crassa	52.322	wild grass grains
Ae. caudata	16.682	wild grass grains
Ae. caudata	9.164	wild grass grains
Ae. caudata	57.629	wild grass grains
Ae. caudata	59.325	wild grass grains
Ae. caudata	52.372	wild grass grains
Ae. caudata	34.158	wild grass grains
Ae. caudata	44.942	wild grass grains
Ae. caudata	27.095	wild grass grains
Ae. caudata	20.192	wild grass grains
Ae. caudata	44.57	wild grass grains
Ae. caudata	34.374	wild grass grains
Ae. caudata	35.163	wild grass grains
Ae. caudata	7.135	wild grass grains
Ae. caudata	7.46	wild grass grains
Ae. caudata	6.204	wild grass grains
Ae. caudata	6.88	wild grass grains
Ae. caudata	7.8	wild grass grains
Ae. caudata	5.871	wild grass grains
Ae. caudata	5.63	wild grass grains
Ae. caudata	5.287	wild grass grains
Ae. caudata	6.817	wild grass grains
Ae. caudata	13.599	wild grass grains
Ae. caudata	12.797	wild grass grains
Ae. caudata	7.986	wild grass grains
Ae. caudata	6.809	wild grass grains
Ae. caudata	35.571	wild grass grains
Ae. caudata	6.936	wild grass grains
Ae. caudata	9.258	wild grass grains
Ae. caudata	8.427	wild grass grains
Ae. caudata	10.386	wild grass grains
Ae. caudata	13.764	wild grass grains
Ae. caudata	28.92	wild grass grains
Ae. caudata	39.04	wild grass grains
Ae. caudata	22.383	wild grass grains
Ae. caudata	16.044	wild grass grains
Ae. caudata	29.225	wild grass grains
Ae. caudata	27.999	wild grass grains
Ae. caudata	7.608	wild grass grains
Ae. caudata	9.792	wild grass grains
Ae. caudata	29.906	wild grass grains
Ae. caudata	35.43	wild grass grains
Ae. caudata	31.291	wild grass grains
Ae. caudata	7.413	wild grass grains
Ae. caudata	6.331	wild grass grains
Ae. caudata	27.451	wild grass grains
Ae. caudata	24.163	wild grass grains
Ae. caudata	25.723	wild grass grains
Ae. caudata	34.398	wild grass grains
Ae. caudata	37.11	wild grass grains
Ae. cylindrica	53.927	wild grass grains
Ae. cylindrica	23.347	wild grass grains
Ae. cylindrica	30.579	wild grass grains
Ae. cylindrica	27.77	wild grass grains
Ae. cylindrica	27.99	wild grass grains
Ae. cylindrica	34.449	wild grass grains
Ae. cylindrica	25.502	wild grass grains
Ae. cylindrica	18.146	wild grass grains
Ae. cylindrica	15.379	wild grass grains
Ae. cylindrica	14.103	wild grass grains
Ae. cylindrica	16.421	wild grass grains
Ae. cylindrica	54.047	wild grass grains
Ae. cylindrica	45.344	wild grass grains
Ae. cylindrica	16.546	wild grass grains
Ae. cylindrica	8.519	wild grass grains
Ae. cylindrica	18.359	wild grass grains
Ae. cylindrica	40.672	wild grass grains
Ae. cylindrica	9.312	wild grass grains
Ae. cylindrica	9.991	wild grass grains
Ae. cylindrica	26.746	wild grass grains
Ae. cylindrica	24.976	wild grass grains
Ae. cylindrica	9.898	wild grass grains
Ae. cylindrica	12.085	wild grass grains
Ae. cylindrica	36.432	wild grass grains
Ae. cylindrica	47.912	wild grass grains
Ae. cylindrica	10.275	wild grass grains
Ae. cylindrica	11.191	wild grass grains
Ae. cylindrica	9.203	wild grass grains
Ae. cylindrica	12.503	wild grass grains
Ae. cylindrica	11.225	wild grass grains
Ae. cylindrica	31.816	wild grass grains
Ae. cylindrica	9.327	wild grass grains
Ae. cylindrica	42.8	wild grass grains
Ae. cylindrica	29.536	wild grass grains
Ae. cylindrica	39.246	wild grass grains
Ae. cylindrica	24.396	wild grass grains
Ae. cylindrica	13.676	wild grass grains
Ae. cylindrica	38.419	wild grass grains
Ae. cylindrica	13.81	wild grass grains
Ae. cylindrica	10.052	wild grass grains
Ae. cylindrica	10.352	wild grass grains
Ae. cylindrica	35.013	wild grass grains
Ae. cylindrica	42.8	wild grass grains
Ae. cylindrica	15.331	wild grass grains
Ae. cylindrica	24.045	wild grass grains
Ae. cylindrica	41.326	wild grass grains
Ae. cylindrica	25.779	wild grass grains
Ae. cylindrica	11.524	wild grass grains
Ae. cylindrica	25.368	wild grass grains
Ae. cylindrica	22.566	wild grass grains
Ae. peregrina	25.553	wild grass grains
Ae. peregrina	24.304	wild grass grains
Ae. peregrina	28.812	wild grass grains
Ae. peregrina	51.699	wild grass grains
Ae. peregrina	48.828	wild grass grains
Ae. peregrina	53.616	wild grass grains
Ae. peregrina	49.857	wild grass grains
Ae. peregrina	35.746	wild grass grains
Ae. peregrina	33.846	wild grass grains
Ae. peregrina	24.318	wild grass grains
Ae. peregrina	31.106	wild grass grains
Ae. peregrina	28.616	wild grass grains
Ae. peregrina	29.346	wild grass grains
Ae. peregrina	33.385	wild grass grains
Ae. peregrina	22.151	wild grass grains
Ae. peregrina	30.783	wild grass grains
Ae. peregrina	34.111	wild grass grains
Ae. peregrina	22.718	wild grass grains
Ae. peregrina	24.089	wild grass grains
Ae. peregrina	32.965	wild grass grains
Ae. peregrina	21.279	wild grass grains
Ae. peregrina	26.016	wild grass grains
Ae. peregrina	21.532	wild grass grains
Ae. peregrina	37.182	wild grass grains
Ae. peregrina	25.703	wild grass grains
Ae. peregrina	22.485	wild grass grains
Ae. peregrina	16.811	wild grass grains
Ae. peregrina	24.176	wild grass grains
Ae. peregrina	31.484	wild grass grains
Ae. peregrina	40.11	wild grass grains
Ae. peregrina	21.872	wild grass grains
Ae. peregrina	18.614	wild grass grains
Ae. peregrina	33.95	wild grass grains
Ae. peregrina	25.773	wild grass grains
Ae. peregrina	23.212	wild grass grains
Ae. peregrina	18.322	wild grass grains
Ae. peregrina	22.54	wild grass grains
Ae. peregrina	16.713	wild grass grains
Ae. peregrina	26.083	wild grass grains
Ae. peregrina	15.182	wild grass grains
Ae. peregrina	29.54	wild grass grains
Ae. peregrina	16.425	wild grass grains
Ae. peregrina	15.699	wild grass grains
Ae. peregrina	13.353	wild grass grains
Ae. peregrina	31.564	wild grass grains
Ae. peregrina	41.996	wild grass grains
Ae. peregrina	15.648	wild grass grains
Ae. peregrina	9.836	wild grass grains
Ae. peregrina	33.957	wild grass grains
Ae. peregrina	28.291	wild grass grains
Ae. uniaristata	34.614	wild grass grains
Ae. uniaristata	31.928	wild grass grains
Ae. uniaristata	20.135	wild grass grains
Ae. uniaristata	25.595	wild grass grains
Ae. uniaristata	21.559	wild grass grains
Ae. uniaristata	17.339	wild grass grains
Ae. uniaristata	25.598	wild grass grains
Ae. uniaristata	20.56	wild grass grains
Ae. uniaristata	50.923	wild grass grains
Ae. uniaristata	45.713	wild grass grains
Ae. uniaristata	40.234	wild grass grains
Ae. uniaristata	42.24	wild grass grains
Ae. uniaristata	24.789	wild grass grains
Ae. uniaristata	25.932	wild grass grains
Ae. uniaristata	26.609	wild grass grains
Ae. uniaristata	54.883	wild grass grains
Ae. uniaristata	51.169	wild grass grains
Ae. uniaristata	58.552	wild grass grains
Ae. uniaristata	54.504	wild grass grains
Ae. uniaristata	36.959	wild grass grains
Ae. uniaristata	48.546	wild grass grains
Ae. uniaristata	47.348	wild grass grains
Ae. uniaristata	52.153	wild grass grains
Ae. uniaristata	48.489	wild grass grains
Ae. uniaristata	42.836	wild grass grains
Ae. uniaristata	45.133	wild grass grains
Ae. uniaristata	46.296	wild grass grains
Ae. uniaristata	23.813	wild grass grains
Ae. uniaristata	37.513	wild grass grains
Ae. uniaristata	36.878	wild grass grains
Ae. uniaristata	37.616	wild grass grains
Ae. uniaristata	49.404	wild grass grains
Ae. uniaristata	48.518	wild grass grains
Ae. uniaristata	50.933	wild grass grains
Ae. uniaristata	27.936	wild grass grains
Ae. uniaristata	32.611	wild grass grains
Ae. uniaristata	62.375	wild grass grains
Ae. uniaristata	18.549	wild grass grains
Ae. uniaristata	44.718	wild grass grains
Ae. uniaristata	38.42	wild grass grains
Ae. uniaristata	43.089	wild grass grains
Ae. uniaristata	18.226	wild grass grains
Ae. uniaristata	51.611	wild grass grains
Ae. uniaristata	32.697	wild grass grains
Ae. uniaristata	14.345	wild grass grains
Ae. uniaristata	48.509	wild grass grains
Ae. uniaristata	23.136	wild grass grains
Ae. uniaristata	58.173	wild grass grains
Ae. uniaristata	45.049	wild grass grains
Ae. uniaristata	24.046	wild grass grains
H. vulgare distichon	5.189	domestic cereal
H. vulgare distichon	5.353	domestic cereal
H. vulgare distichon	5.389	domestic cereal
H. vulgare distichon	5.403	domestic cereal
H. vulgare distichon	5.439	domestic cereal
H. vulgare distichon	5.61	domestic cereal
H. vulgare distichon	5.898	domestic cereal
H. vulgare distichon	6.19	domestic cereal
H. vulgare distichon	6.379	domestic cereal
H. vulgare distichon	6.455	domestic cereal
H. vulgare distichon	7.397	domestic cereal
H. vulgare distichon	13.65	domestic cereal
H. vulgare distichon	16.343	domestic cereal
H. vulgare distichon	19.104	domestic cereal
H. vulgare distichon	19.429	domestic cereal
H. vulgare distichon	19.843	domestic cereal
H. vulgare distichon	19.913	domestic cereal
H. vulgare distichon	19.935	domestic cereal
H. vulgare distichon	20.508	domestic cereal
H. vulgare distichon	20.921	domestic cereal
H. vulgare distichon	21.003	domestic cereal
H. vulgare distichon	21.231	domestic cereal
H. vulgare distichon	21.669	domestic cereal
H. vulgare distichon	21.954	domestic cereal
H. vulgare distichon	22.186	domestic cereal
H. vulgare distichon	22.236	domestic cereal
H. vulgare distichon	22.348	domestic cereal
H. vulgare distichon	22.983	domestic cereal
H. vulgare distichon	23.041	domestic cereal
H. vulgare distichon	23.342	domestic cereal
H. vulgare distichon	23.39	domestic cereal
H. vulgare distichon	23.417	domestic cereal
H. vulgare distichon	23.615	domestic cereal
H. vulgare distichon	24.64	domestic cereal
H. vulgare distichon	24.764	domestic cereal
H. vulgare distichon	24.81	domestic cereal
H. vulgare distichon	25.34	domestic cereal
H. vulgare distichon	25.361	domestic cereal
H. vulgare distichon	25.808	domestic cereal
H. vulgare distichon	26.705	domestic cereal
H. vulgare distichon	26.992	domestic cereal
H. vulgare distichon	27.419	domestic cereal
H. vulgare distichon	27.58	domestic cereal
H. vulgare distichon	27.622	domestic cereal
H. vulgare distichon	28.241	domestic cereal
H. vulgare distichon	28.464	domestic cereal
H. vulgare distichon	28.718	domestic cereal
H. vulgare distichon	28.881	domestic cereal
H. vulgare distichon	29.116	domestic cereal
H. vulgare distichon	29.592	domestic cereal
T. monococcum	19.222	domestic cereal
T. monococcum	25.621	domestic cereal
T. monococcum	21.905	domestic cereal
T. monococcum	31.882	domestic cereal
T. monococcum	24.995	domestic cereal
T. monococcum	22.527	domestic cereal
T. monococcum	25.569	domestic cereal
T. monococcum	30.17	domestic cereal
T. monococcum	15.986	domestic cereal
T. monococcum	28.366	domestic cereal
T. monococcum	13.911	domestic cereal
T. monococcum	17.917	domestic cereal
T. monococcum	10.455	domestic cereal
T. monococcum	9.534	domestic cereal
T. monococcum	21.407	domestic cereal
T. monococcum	16.063	domestic cereal
T. monococcum	15.967	domestic cereal
T. monococcum	30.362	domestic cereal
T. monococcum	14.144	domestic cereal
T. monococcum	15.243	domestic cereal
T. monococcum	18.827	domestic cereal
T. monococcum	17.683	domestic cereal
T. monococcum	13.652	domestic cereal
T. monococcum	36.609	domestic cereal
T. monococcum	31.38	domestic cereal
T. monococcum	26.879	domestic cereal
T. monococcum	19.944	domestic cereal
T. monococcum	18.581	domestic cereal
T. monococcum	15.552	domestic cereal
T. monococcum	20.992	domestic cereal
T. monococcum	18.488	domestic cereal
T. monococcum	19.897	domestic cereal
T. monococcum	22.583	domestic cereal
T. monococcum	14.989	domestic cereal
T. monococcum	31.881	domestic cereal
T. monococcum	12.455	domestic cereal
T. monococcum	12.596	domestic cereal
T. monococcum	16.496	domestic cereal
T. monococcum	12.006	domestic cereal
T. monococcum	14.249	domestic cereal
T. monococcum	18.889	domestic cereal
T. monococcum	27.736	domestic cereal
T. monococcum	19.805	domestic cereal
T. monococcum	25.259	domestic cereal
T. monococcum	27.416	domestic cereal
T. monococcum	8.241	domestic cereal
T. monococcum	6.676	domestic cereal
T. monococcum	10.055	domestic cereal
T. monococcum	31.554	domestic cereal
T. monococcum	20.623	domestic cereal
T. dicoccum	27.156	domestic cereal
T. dicoccum	9.315	domestic cereal
T. dicoccum	9.171	domestic cereal
T. dicoccum	7.795	domestic cereal
T. dicoccum	29.271	domestic cereal
T. dicoccum	24.317	domestic cereal
T. dicoccum	10.922	domestic cereal
T. dicoccum	24.247	domestic cereal
T. dicoccum	13.995	domestic cereal
T. dicoccum	20.938	domestic cereal
T. dicoccum	18.278	domestic cereal
T. dicoccum	7.119	domestic cereal
T. dicoccum	26.713	domestic cereal
T. dicoccum	27.638	domestic cereal
T. dicoccum	10.082	domestic cereal
T. dicoccum	20.844	domestic cereal
T. dicoccum	9.925	domestic cereal
T. dicoccum	8.14	domestic cereal
T. dicoccum	7.552	domestic cereal
T. dicoccum	6.166	domestic cereal
T. dicoccum	12.762	domestic cereal
T. dicoccum	8.233	domestic cereal
T. dicoccum	12.915	domestic cereal
T. dicoccum	30.055	domestic cereal
T. dicoccum	27.922	domestic cereal
T. dicoccum	20.321	domestic cereal
T. dicoccum	15.938	domestic cereal
T. dicoccum	41.546	domestic cereal
T. dicoccum	27.157	domestic cereal
T. dicoccum	19.841	domestic cereal
T. dicoccum	32.076	domestic cereal
T. dicoccum	28.587	domestic cereal
T. dicoccum	28.948	domestic cereal
T. dicoccum	19.052	domestic cereal
T. dicoccum	20.701	domestic cereal
T. dicoccum	11.74	domestic cereal
T. dicoccum	13.531	domestic cereal
T. dicoccum	16.88	domestic cereal
T. dicoccum	9.21	domestic cereal
T. dicoccum	12.131	domestic cereal
T. dicoccum	8.33	domestic cereal
T. dicoccum	10.317	domestic cereal
T. dicoccum	6.55	domestic cereal
T. dicoccum	9.433	domestic cereal
T. dicoccum	10.874	domestic cereal
T. dicoccum	9.544	domestic cereal
T. dicoccum	8.677	domestic cereal
T. dicoccum	12.04	domestic cereal
T. dicoccum	10.052	domestic cereal
T. dicoccum	9.279	domestic cereal
